# Supplementary material for: OLR1 Promotes Pancreatic Cancer Metastasis via Increased c-Myc Expression and Transcription of HMGA2
Source: Oxford University Press journal article supplement (doi:10.1158/1541-7786.mcr-19-0718), 2020-02-04
Supplement: 15417786mcr190718-sup-225594_2_supp_5976847_q2skrd.xlsx [file 15417786mcr190718-sup-225594_2_supp_5976847_q2skrd.xlsx]

## Sheet: all.counts.Bxpc-3-OE-lucif_vs_B
gene id	gene name	log2FC	Pvalue	Qvalue	updown
ENSG00000283029	RN7SL1	#NAME?	9.05465e-196	2.1656e-191	DOWN
ENSG00000269711	CTD-3214H19.16	#NAME?	1.43056e-27	1.4876e-24	DOWN
ENSG00000243207	PPAN-P2RY11	#NAME?	2.07007e-21	1.54719e-18	DOWN
ENSG00000197991	RP11-310K10.1	#NAME?	7.42892e-10	1.50574e-07	DOWN
ENSG00000258588	TRIM6-TRIM34	#NAME?	2.21221e-08	3.72276e-06	DOWN
ENSG00000260879	RP11-483I13.5	#NAME?	1.54285e-05	0.00132735	DOWN
ENSG00000186105	LRRC70	#NAME?	2.86152e-05	0.00220771	DOWN
ENSG00000268083	AC104534.3	#NAME?	5.32834e-05	0.00368318	DOWN
ENSG00000236762	RP11-159H3.1	#NAME?	0.000352487	0.0180137	DOWN
ENSG00000269891	ARHGAP19-SLIT1	#NAME?	0.000352487	0.0180137	DOWN
ENSG00000259040	BLOC1S5-TXNDC5	Inf	8.03923e-124	9.61371e-120	UP
ENSG00000254692	RP11-468E2.1	Inf	2.40094e-62	1.14847e-58	UP
ENSG00000215472	RPL17-C18orf32	Inf	1.29501e-44	3.44142e-41	UP
ENSG00000278249	SCARNA2	Inf	6.05309e-43	1.31611e-39	UP
ENSG00000259132	RP11-298I3.5	Inf	2.02521e-28	2.30652e-25	UP
ENSG00000261796	ISY1-RAB43	Inf	2.02521e-28	2.30652e-25	UP
ENSG00000258838	ERCC6-PGBD3	Inf	1.52753e-16	7.61126e-14	UP
ENSG00000256349	CTD-3074O7.11	Inf	3.96752e-16	1.86061e-13	UP
ENSG00000282955	RABL6	Inf	8.98453e-14	3.35755e-11	UP
ENSG00000280165	PCDH20	Inf	5.64977e-12	1.75488e-09	UP
ENSG00000274600	RIMBP3B	Inf	8.24314e-11	1.93285e-08	UP
ENSG00000256500	RP11-73M18.2	Inf	2.45934e-10	5.39633e-08	UP
ENSG00000277726	RP4-635E18.9	Inf	9.96168e-05	0.00628637	UP
ENSG00000249319	AC068533.7	Inf	0.000352487	0.0180137	UP
ENSG00000173598	NUDT4	5.92748	2.61546e-82	1.56385e-78	UP
ENSG00000203818	HIST2H3PS2	5.25934	3.00325e-10	6.47106e-08	UP
ENSG00000170160	CCDC144A	5.22616	5.03731e-10	1.04763e-07	UP
ENSG00000213689	TREX1	5.19222	1.89626e-21	1.46299e-18	UP
ENSG00000233822	HIST1H2BN	5.16622	6.61041e-58	2.63502e-54	UP
ENSG00000281453	TGFB2-OT1	5.04782	1.03334e-19	6.33705e-17	UP
ENSG00000241697	TMEFF1	4.92917	3.4461e-08	5.56895e-06	UP
ENSG00000240963	RP11-518L10.5	4.6328	6.47615e-11	1.5489e-08	UP
ENSG00000277342	RP11-843B15.4	4.55481	1.5797e-06	0.000175729	UP
ENSG00000108825	PTGES3L-AARSD1	4.28102	7.29609e-12	2.21598e-09	UP
ENSG00000136997	MYC	4.11978	1.54288e-44	3.69011e-41	UP
ENSG00000244457	ENO1P1	4.08529	3.50432e-08	5.62502e-06	UP
ENSG00000229334	AC046143.3	3.96979	0.000252789	0.0138036	UP
ENSG00000126759	CFP	3.96979	0.000252789	0.0138036	UP
ENSG00000164761	TNFRSF11B	3.88737	0.000447975	0.0217327	UP
ENSG00000129473	BCL2L2	3.55392	8.38393e-40	1.67099e-36	UP
ENSG00000170161	RP11-262H14.4	3.29175	2.42031e-07	3.34604e-05	UP
ENSG00000180185	FAHD1	3.14561	4.55868e-21	3.20676e-18	UP
ENSG00000161654	LSM12	3.14443	7.24064e-19	4.22377e-16	UP
ENSG00000251503	APITD1-CORT	3.04784	0.000700954	0.0317514	UP
ENSG00000257046	RP11-545J16.1	2.93111	2.00051e-23	1.77208e-20	UP
ENSG00000260238	PMF1-BGLAP	2.92919	2.7836e-09	5.36898e-07	UP
ENSG00000257594	GALNT4	2.90936	5.51622e-32	1.01486e-28	UP
ENSG00000125695	RP11-51F16.8	2.88737	3.35545e-05	0.00250788	UP
ENSG00000154646	TMPRSS15	2.85881	0.000126105	0.00766777	UP
ENSG00000147124	ZNF41	2.85114	3.55614e-21	2.57734e-18	UP
ENSG00000255508	RP11-864I4.1	2.78905	5.24911e-25	5.02171e-22	UP
ENSG00000225828	FAM229A	2.72047	3.81869e-11	9.71612e-09	UP
ENSG00000162433	AK4	2.61484	3.92628e-28	4.2684e-25	UP
ENSG00000181904	C5orf24	2.59572	7.37811e-17	3.75452e-14	UP
ENSG00000076067	RBMS2	2.54276	5.12527e-30	6.81006e-27	UP
ENSG00000241119	UGT1A9	2.53981	2.93778e-23	2.50939e-20	UP
ENSG00000248323	LUCAT1	2.52237	1.05419e-07	1.57582e-05	UP
ENSG00000100985	MMP9	2.50033	1.0518e-08	1.8497e-06	UP
ENSG00000155265	GOLGA7B	2.46733	3.18276e-10	6.79662e-08	UP
ENSG00000270882	HIST2H4A	2.45211	9.27589e-29	1.16764e-25	UP
ENSG00000198298	ZNF485	2.38486	6.52268e-07	8.08305e-05	UP
ENSG00000173546	CSPG4	2.36277	5.14056e-11	1.25456e-08	UP
ENSG00000130311	DDA1	2.35568	9.39077e-19	5.3476e-16	UP
ENSG00000249471	ZNF324B	2.248	1.32451e-12	4.46172e-10	UP
ENSG00000254536	RP11-108K14.8	2.20199	0.000184687	0.0106695	UP
ENSG00000078140	UBE2K	2.15338	7.44259e-21	5.08584e-18	UP
ENSG00000219545	UMAD1	2.11375	2.52625e-11	6.78879e-09	UP
ENSG00000174306	ZHX3	2.0793	9.39575e-14	3.4572e-11	UP
ENSG00000171084	FAM86JP	2.05624	9.86843e-05	0.00626056	UP
ENSG00000140297	GCNT3	2.03021	5.7756e-06	0.000575563	UP
ENSG00000166801	FAM111A	2.02226	7.63766e-20	4.8071e-17	UP
ENSG00000212123	PRR22	2.00934	0.00041851	0.0206808	UP
ENSG00000167523	SPATA33	1.98887	2.24277e-08	3.72502e-06	UP
ENSG00000131467	PSME3	1.96518	2.44661e-18	1.36083e-15	UP
ENSG00000188033	ZNF490	1.96214	2.4445e-10	5.39633e-08	UP
ENSG00000249773	RP11-15K19.2	1.95827	2.17489e-08	3.68913e-06	UP
ENSG00000144476	ACKR3	1.90226	6.1327e-06	0.00060113	UP
ENSG00000198816	ZNF358	1.90226	6.1327e-06	0.00060113	UP
ENSG00000147536	GINS4	1.89804	4.41661e-12	1.3899e-09	UP
ENSG00000130520	LSM4	1.88802	4.11968e-14	1.61525e-11	UP
ENSG00000108468	CBX1	1.85298	1.42734e-14	5.88581e-12	UP
ENSG00000185090	MANEAL	1.85231	2.26592e-07	3.15082e-05	UP
ENSG00000164284	GRPEL2	1.79987	1.12033e-14	4.70086e-12	UP
ENSG00000175265	GOLGA8A	1.77621	1.32874e-15	5.99612e-13	UP
ENSG00000149792	MRPL49	1.76497	6.57896e-13	2.28042e-10	UP
ENSG00000279141	LINC01451	1.76336	0.000864433	0.0380049	UP
ENSG00000102401	ARMCX3	1.73275	1.02487e-11	2.98925e-09	UP
ENSG00000260914	RP11-343C2.11	1.67438	0.000159196	0.00942448	UP
ENSG00000100206	DMC1	1.66241	0.00118125	0.0492193	UP
ENSG00000171385	KCND3	1.6376	9.51185e-08	1.43079e-05	UP
ENSG00000117152	RGS4	1.61805	0.000113737	0.00701094	UP
ENSG00000177034	MTX3	1.59544	1.77511e-10	4.04336e-08	UP
ENSG00000167074	TEF	1.59525	1.94195e-10	4.38167e-08	UP
ENSG00000166710	B2M	1.58497	3.23324e-14	1.28882e-11	UP
ENSG00000275221	HIST1H2AK	1.57597	8.50621e-07	0.000101215	UP
ENSG00000244687	UBE2V1	1.57207	3.95658e-13	1.43378e-10	UP
ENSG00000144580	RQCD1	1.55348	7.31959e-12	2.21598e-09	UP
ENSG00000272884	RP11-104H15.10	1.54986	8.34855e-05	0.00544066	UP
ENSG00000167552	TUBA1A	1.53684	1.20755e-07	1.79385e-05	UP
ENSG00000079308	TNS1	1.52421	8.23172e-05	0.00539111	UP
ENSG00000234444	ZNF736	1.51605	2.29554e-05	0.00182323	UP
ENSG00000063978	RNF4	1.5101	2.44368e-11	6.64152e-09	UP
ENSG00000099625	CBARP	1.50033	0.000704966	0.0318727	UP
ENSG00000174442	ZWILCH	1.49919	1.39935e-11	3.89166e-09	UP
ENSG00000049246	PER3	1.49342	3.921e-11	9.7763e-09	UP
ENSG00000183760	ACP7	1.49172	6.13151e-05	0.00414089	UP
ENSG00000182600	C2orf82	1.48795	0.000616405	0.0284606	UP
ENSG00000166225	FRS2	1.47158	3.16755e-11	8.23459e-09	UP
ENSG00000226145	KRT16P6	1.44875	6.67684e-10	1.37664e-07	UP
ENSG00000078967	UBE2D4	1.4452	9.52718e-06	0.000890085	UP
ENSG00000181896	ZNF101	1.44196	3.46671e-05	0.00255118	UP
ENSG00000184517	ZFP1	1.43457	1.96287e-07	2.7944e-05	UP
ENSG00000267426	RP11-552F3.12	1.42787	0.000395595	0.0196704	UP
ENSG00000275126	HIST1H4L	1.42546	4.64014e-07	5.93467e-05	UP
ENSG00000160201	U2AF1	1.40755	9.51896e-06	0.000890085	UP
ENSG00000128408	RIBC2	1.40556	0.000378996	0.0191637	UP
ENSG00000226396	RP5-1056L3.3	1.39776	3.27951e-05	0.00245881	UP
ENSG00000183598	HIST2H3D	1.38482	3.27951e-05	0.00245881	UP
ENSG00000069849	ATP1B3	1.3843	7.4509e-11	1.76439e-08	UP
ENSG00000104626	ERI1	1.38251	3.57069e-09	6.72442e-07	UP
ENSG00000138942	RNF185	1.37865	1.61338e-08	2.75624e-06	UP
ENSG00000170684	ZNF296	1.36545	0.00034774	0.0179244	UP
ENSG00000164181	ELOVL7	1.36428	1.54474e-08	2.67722e-06	UP
ENSG00000169255	B3GALNT1	1.36245	1.87677e-06	0.000207677	UP
ENSG00000188283	ZNF383	1.36174	2.06695e-05	0.00168147	UP
ENSG00000278637	HIST1H4A	1.3436	1.95609e-06	0.000213625	UP
ENSG00000149948	HMGA2	1.34157	2.15033e-14	5.80086e-12	UP
ENSG00000183283	DAZAP2	1.34043	4.49692e-10	9.43447e-08	UP
ENSG00000280987	MATR3	1.31304	9.76364e-10	1.94598e-07	UP
ENSG00000240288	GHRLOS	1.30888	7.0476e-05	0.00470831	UP
ENSG00000141560	FN3KRP	1.30421	1.02131e-06	0.000117436	UP
ENSG00000124767	GLO1	1.30182	1.21173e-09	2.39512e-07	UP
ENSG00000080822	CLDND1	1.30089	3.05619e-09	5.82158e-07	UP
ENSG00000176597	B3GNT5	1.25886	6.25787e-09	1.12534e-06	UP
ENSG00000135678	CPM	1.25649	6.098e-09	1.10489e-06	UP
ENSG00000166396	SERPINB7	1.25593	0.000154621	0.00917635	UP
ENSG00000170417	TMEM182	1.25442	0.000807467	0.0358754	UP
ENSG00000280120	RP11-546D6.3	1.2428	0.000578727	0.0269288	UP
ENSG00000198040	ZNF84	1.24044	1.54743e-07	2.2295e-05	UP
ENSG00000139173	TMEM117	1.23928	1.73967e-05	0.00143474	UP
ENSG00000138092	CENPO	1.23252	3.19793e-07	4.2729e-05	UP
ENSG00000204147	ASAH2B	1.22956	9.00275e-05	0.00581943	UP
ENSG00000015153	YAF2	1.22057	1.20238e-06	0.000137595	UP
ENSG00000183044	ABAT	1.21882	9.4904e-07	0.000110507	UP
ENSG00000111261	MANSC1	1.21265	1.10596e-05	0.00100731	UP
ENSG00000145934	TENM2	1.20925	0.000878797	0.0384948	UP
ENSG00000103064	SLC7A6	1.20704	1.27473e-08	2.22537e-06	UP
ENSG00000236144	TMEM147-AS1	1.19956	1.92932e-06	0.000211668	UP
ENSG00000114503	NCBP2	1.19521	1.33081e-07	1.95269e-05	UP
ENSG00000182010	RTKN2	1.19517	0.000199801	0.0113507	UP
ENSG00000157214	STEAP2	1.17721	2.13885e-07	3.00911e-05	UP
ENSG00000198663	C6orf89	1.17481	6.59543e-08	1.0177e-05	UP
ENSG00000158042	MRPL17	1.17123	6.07019e-06	0.000599966	UP
ENSG00000178761	FAM219B	1.16773	2.75634e-06	0.000289137	UP
ENSG00000174307	PHLDA3	1.15011	8.36484e-07	0.000100031	UP
ENSG00000147010	SH3KBP1	1.14945	2.44399e-06	0.00025961	UP
ENSG00000162981	FAM84A	1.14667	0.000401306	0.0199129	UP
ENSG00000206195	DUXAP8	1.14316	7.22809e-05	0.00481544	UP
ENSG00000077713	SLC25A43	1.13353	1.80681e-05	0.001485	UP
ENSG00000265185	SNORD3B-1	1.13329	0.000284097	0.015066	UP
ENSG00000185864	NPIPB4	1.12181	0.000191087	0.0109598	UP
ENSG00000189337	KAZN	1.12179	0.000335453	0.0174414	UP
ENSG00000122068	FYTTD1	1.1085	4.84234e-07	6.12774e-05	UP
ENSG00000108784	NAGLU	1.10744	2.94876e-05	0.00226208	UP
ENSG00000105136	ZNF419	1.10679	1.71873e-05	0.00143474	UP
ENSG00000196247	ZNF107	1.10567	2.14273e-05	0.00173024	UP
ENSG00000144642	RBMS3	1.08591	2.40981e-05	0.00190216	UP
ENSG00000077238	IL4R	1.07737	5.33918e-07	6.72091e-05	UP
ENSG00000175348	TMEM9B	1.07582	4.95556e-05	0.00343542	UP
ENSG00000166886	NAB2	1.07561	2.21753e-06	0.00023824	UP
ENSG00000184162	NR2C2AP	1.07551	0.000342162	0.0177132	UP
ENSG00000150779	TIMM8B	1.06905	0.000132083	0.00795724	UP
ENSG00000276168	RN7SL1	1.06379	2.13862e-07	3.00911e-05	UP
ENSG00000242259	C22orf39	1.05678	0.000472556	0.0226042	UP
ENSG00000097033	SH3GLB1	1.05043	5.85212e-07	7.28985e-05	UP
ENSG00000158062	UBXN11	1.05024	3.62608e-05	0.00264406	UP
ENSG00000137804	NUSAP1	1.04743	7.89233e-07	9.53338e-05	UP
ENSG00000139645	ANKRD52	1.04505	7.60639e-07	9.32933e-05	UP
ENSG00000160404	TOR2A	1.04195	0.000807521	0.0358754	UP
ENSG00000077152	UBE2T	1.04088	0.00069414	0.0315024	UP
ENSG00000179094	PER1	1.04036	8.60846e-06	0.000820273	UP
ENSG00000117751	PPP1R8	1.0369	4.1073e-06	0.000419805	UP
ENSG00000103037	SETD6	1.03575	0.000266177	0.014306	UP
ENSG00000109685	WHSC1	1.02947	8.6628e-07	0.000102063	UP
ENSG00000124610	HIST1H1A	1.02594	0.000769985	0.0343577	UP
ENSG00000152377	SPOCK1	1.01644	4.1636e-05	0.00294618	UP
ENSG00000205730	ITPRIPL2	1.01399	1.88426e-06	0.000207677	UP
ENSG00000106636	YKT6	1.00843	2.45315e-06	0.00025961	UP
ENSG00000181135	ZNF707	1.00373	0.000111148	0.00692273	UP
ENSG00000111145	ELK3	1.00134	6.07065e-06	0.000599966	UP
ENSG00000121057	AKAP1	1.00132	7.35904e-06	0.000712576	UP
ENSG00000243649	CFB	-1.0009	1.17275e-05	0.00105844	DOWN
ENSG00000173786	CNP	-1.00288	1.0712e-05	0.00098306	DOWN
ENSG00000204610	TRIM15	-1.00549	0.000267898	0.0143662	DOWN
ENSG00000154451	GBP5	-1.01098	0.000175904	0.0102612	DOWN
ENSG00000187764	SEMA4D	-1.01336	0.000809627	0.0358754	DOWN
ENSG00000138459	SLC35A5	-1.0184	2.98238e-05	0.00227165	DOWN
ENSG00000101347	SAMHD1	-1.02155	1.4501e-06	0.000163595	DOWN
ENSG00000174705	SH3PXD2B	-1.02611	0.000343102	0.0177235	DOWN
ENSG00000101413	RPRD1B	-1.02807	2.23114e-06	0.00023824	DOWN
ENSG00000090612	ZNF268	-1.03575	5.44073e-06	0.000546748	DOWN
ENSG00000139146	FAM60A	-1.03809	1.43355e-06	0.000162494	DOWN
ENSG00000162366	PDZK1IP1	-1.04058	1.36416e-05	0.00120393	DOWN
ENSG00000119772	DNMT3A	-1.04726	2.48266e-05	0.00194681	DOWN
ENSG00000082641	NFE2L1	-1.04989	7.66688e-07	9.35556e-05	DOWN
ENSG00000131203	IDO1	-1.05238	1.26912e-05	0.00112838	DOWN
ENSG00000175938	ORAI3	-1.05518	0.000494103	0.0235877	DOWN
ENSG00000256053	APOPT1	-1.0564	2.21526e-05	0.00177198	DOWN
ENSG00000153561	RMND5A	-1.05687	1.5378e-06	0.000171867	DOWN
ENSG00000108963	DPH1	-1.06074	3.44532e-05	0.00254326	DOWN
ENSG00000165030	NFIL3	-1.06124	1.28742e-05	0.00114041	DOWN
ENSG00000262526	CTD-2545G14.7	-1.06263	0.000464816	0.0223682	DOWN
ENSG00000007866	TEAD3	-1.06407	2.98669e-06	0.000310577	DOWN
ENSG00000139977	NAA30	-1.06716	2.01411e-06	0.000218961	DOWN
ENSG00000156253	RWDD2B	-1.0703	6.2615e-05	0.00420664	DOWN
ENSG00000187608	ISG15	-1.07447	6.879e-07	8.48068e-05	DOWN
ENSG00000115944	COX7A2L	-1.07752	3.70127e-05	0.00267442	DOWN
ENSG00000146411	SLC2A12	-1.08278	0.000435749	0.0213125	DOWN
ENSG00000143549	TPM3	-1.08848	3.24736e-07	4.291e-05	DOWN
ENSG00000241258	CRCP	-1.09768	2.97159e-05	0.00227065	DOWN
ENSG00000108861	DUSP3	-1.10498	3.77511e-06	0.000389178	DOWN
ENSG00000185252	ZNF74	-1.10898	0.000734829	0.0330355	DOWN
ENSG00000140254	DUOXA1	-1.1112	8.54863e-05	0.0055411	DOWN
ENSG00000135535	CD164	-1.11246	1.88954e-07	2.70612e-05	DOWN
ENSG00000075826	SEC31B	-1.11474	9.77812e-05	0.00623635	DOWN
ENSG00000078804	TP53INP2	-1.12256	4.75812e-06	0.000484255	DOWN
ENSG00000215182	MUC5AC	-1.12273	1.71873e-05	0.00143474	DOWN
ENSG00000155254	MARVELD1	-1.12735	4.50793e-07	5.79656e-05	DOWN
ENSG00000136514	RTP4	-1.13174	2.73871e-05	0.0021198	DOWN
ENSG00000186480	INSIG1	-1.13259	2.83603e-07	3.85394e-05	DOWN
ENSG00000270069	MIR222HG	-1.13324	1.00882e-06	0.00011656	DOWN
ENSG00000205352	PRR13	-1.14311	1.21938e-05	0.0010933	DOWN
ENSG00000204389	HSPA1A	-1.14438	3.1329e-07	4.20953e-05	DOWN
ENSG00000244122	UGT1A7	-1.14661	8.56465e-07	0.000101406	DOWN
ENSG00000129911	KLF16	-1.15123	2.56903e-06	0.000270676	DOWN
ENSG00000146950	SHROOM2	-1.1526	1.93662e-05	0.00158624	DOWN
ENSG00000123643	SLC36A1	-1.15467	9.16715e-07	0.000107476	DOWN
ENSG00000114013	CD86	-1.15642	0.000130449	0.00787867	DOWN
ENSG00000003989	SLC7A2	-1.16323	2.04587e-06	0.000221408	DOWN
ENSG00000144120	TMEM177	-1.1636	0.000957442	0.0414089	DOWN
ENSG00000185201	IFITM2	-1.16433	5.6914e-07	7.12676e-05	DOWN
ENSG00000124226	RNF114	-1.16595	2.50143e-07	3.43831e-05	DOWN
ENSG00000092847	AGO1	-1.16835	2.67331e-07	3.65358e-05	DOWN
ENSG00000205423	CNEP1R1	-1.17547	9.82561e-06	0.00091085	DOWN
ENSG00000204920	ZNF155	-1.18753	8.09362e-06	0.00077741	DOWN
ENSG00000147789	ZNF7	-1.19608	1.38777e-06	0.000158054	DOWN
ENSG00000109929	SC5D	-1.20014	9.51808e-07	0.000110507	DOWN
ENSG00000078081	LAMP3	-1.20014	7.51719e-06	0.000724954	DOWN
ENSG00000116044	NFE2L2	-1.20074	2.22584e-08	3.72276e-06	DOWN
ENSG00000185885	IFITM1	-1.20272	3.29924e-08	5.36789e-06	DOWN
ENSG00000182704	TSKU	-1.21273	4.33132e-07	5.59958e-05	DOWN
ENSG00000166532	RIMKLB	-1.21495	2.67971e-08	4.38976e-06	DOWN
ENSG00000134321	RSAD2	-1.21509	1.07279e-05	0.00098306	DOWN
ENSG00000094841	UPRT	-1.22151	4.36021e-05	0.0030762	DOWN
ENSG00000118596	SLC16A7	-1.2234	2.92622e-06	0.000305618	DOWN
ENSG00000171492	LRRC8D	-1.22672	4.74207e-08	7.46159e-06	DOWN
ENSG00000103769	RAB11A	-1.22958	8.64155e-09	1.53096e-06	DOWN
ENSG00000125629	INSIG2	-1.22988	3.07211e-07	4.15117e-05	DOWN
ENSG00000251595	ABCA11P	-1.23254	0.000289049	0.0152609	DOWN
ENSG00000165943	MOAP1	-1.24744	8.67543e-06	0.000823374	DOWN
ENSG00000136826	KLF4	-1.25854	4.09401e-08	6.52777e-06	DOWN
ENSG00000187607	ZNF286A	-1.26026	8.02153e-07	9.64075e-05	DOWN
ENSG00000157613	CREB3L1	-1.26287	0.000187877	0.0108016	DOWN
ENSG00000158528	PPP1R9A	-1.26287	0.000187877	0.0108016	DOWN
ENSG00000074706	IPCEF1	-1.27647	0.000149233	0.00890653	DOWN
ENSG00000135709	KIAA0513	-1.2804	1.22468e-07	1.80806e-05	DOWN
ENSG00000161551	ZNF577	-1.29257	1.41703e-05	0.00124143	DOWN
ENSG00000095637	SORBS1	-1.30551	0.000384864	0.0193378	DOWN
ENSG00000168300	PCMTD1	-1.31443	7.61011e-09	1.35829e-06	DOWN
ENSG00000115275	MOGS	-1.31606	2.43522e-08	4.01677e-06	DOWN
ENSG00000159111	MRPL10	-1.32809	3.41276e-07	4.46027e-05	DOWN
ENSG00000185432	METTL7A	-1.33415	5.84338e-09	1.06684e-06	DOWN
ENSG00000185278	ZBTB37	-1.34326	7.60358e-08	1.15831e-05	DOWN
ENSG00000221994	ZNF630	-1.34559	0.000242664	0.01342	DOWN
ENSG00000198585	NUDT16	-1.36	5.47514e-06	0.000547903	DOWN
ENSG00000257489	RP11-175P13.3	-1.36159	0.000104757	0.00655884	DOWN
ENSG00000133026	MYH10	-1.37699	0.00100613	0.0432798	DOWN
ENSG00000179913	B3GNT3	-1.38336	1.77265e-09	3.47513e-07	DOWN
ENSG00000186951	PPARA	-1.38456	5.77245e-09	1.062e-06	DOWN
ENSG00000113389	NPR3	-1.38569	1.38572e-05	0.00121847	DOWN
ENSG00000157978	LDLRAP1	-1.40021	3.74874e-10	7.9344e-08	DOWN
ENSG00000146232	NFKBIE	-1.40066	6.52164e-06	0.000636646	DOWN
ENSG00000213204	RP3-382I10.7	-1.40179	0.00119594	0.0495723	DOWN
ENSG00000182534	MXRA7	-1.40659	7.80923e-07	9.48088e-05	DOWN
ENSG00000118518	RNF146	-1.43195	6.75753e-08	1.03602e-05	DOWN
ENSG00000205213	LGR4	-1.43209	2.79223e-11	7.42019e-09	DOWN
ENSG00000135679	MDM2	-1.43734	4.55495e-11	1.1231e-08	DOWN
ENSG00000205659	LIN52	-1.43892	4.715e-07	5.99833e-05	DOWN
ENSG00000198908	BHLHB9	-1.44369	2.20199e-07	3.07983e-05	DOWN
ENSG00000124208	TMEM189-UBE2V1	-1.44806	5.81338e-11	1.40443e-08	DOWN
ENSG00000135272	MDFIC	-1.45441	3.06694e-09	5.82158e-07	DOWN
ENSG00000248905	FMN1	-1.47016	3.34268e-11	8.59643e-09	DOWN
ENSG00000139644	TMBIM6	-1.4702	3.15948e-12	1.03238e-09	DOWN
ENSG00000265681	RPL17	-1.5025	2.84912e-12	9.46422e-10	DOWN
ENSG00000261934	PCDHGA9	-1.5027	7.82934e-05	0.00515852	DOWN
ENSG00000243135	UGT1A3	-1.50609	2.87411e-10	6.24909e-08	DOWN
ENSG00000205403	CFI	-1.50824	0.000366334	0.0185752	DOWN
ENSG00000069667	RORA	-1.51423	1.38034e-07	2.01303e-05	DOWN
ENSG00000135503	ACVR1B	-1.51704	1.89358e-11	5.20559e-09	DOWN
ENSG00000205710	C17orf107	-1.53453	0.000197693	0.0112577	DOWN
ENSG00000112852	PCDHB2	-1.53572	0.000275399	0.0147025	DOWN
ENSG00000064787	BCAS1	-1.53572	0.000275399	0.0147025	DOWN
ENSG00000137872	SEMA6D	-1.53716	0.000389741	0.0195009	DOWN
ENSG00000247400	DNAJC3-AS1	-1.53716	0.000389741	0.0195009	DOWN
ENSG00000114735	HEMK1	-1.53782	1.56824e-08	2.69838e-06	DOWN
ENSG00000141338	ABCA8	-1.54118	3.75212e-05	0.00269488	DOWN
ENSG00000124120	TTPAL	-1.58737	3.92409e-11	9.7763e-09	DOWN
ENSG00000120217	CD274	-1.59868	4.5252e-08	7.1675e-06	DOWN
ENSG00000119801	YPEL5	-1.60504	8.86352e-12	2.64986e-09	DOWN
ENSG00000213799	ZNF845	-1.61277	1.2385e-11	3.52632e-09	DOWN
ENSG00000205810	KLRC3	-1.61518	0.00108952	0.0462843	DOWN
ENSG00000105879	CBLL1	-1.61616	3.08496e-11	8.10802e-09	DOWN
ENSG00000145860	RNF145	-1.61749	6.53217e-14	2.47984e-11	DOWN
ENSG00000010310	GIPR	-1.65956	3.63991e-09	6.80123e-07	DOWN
ENSG00000002834	LASP1	-1.68855	5.2273e-15	2.23252e-12	DOWN
ENSG00000258525	RP11-829H16.3	-1.70266	8.549e-05	0.0055411	DOWN
ENSG00000198894	CIPC	-1.72125	7.3455e-10	1.50156e-07	DOWN
ENSG00000101126	ADNP	-1.73302	7.9827e-16	3.67158e-13	DOWN
ENSG00000238227	C9orf69	-1.75286	4.78645e-13	1.68349e-10	DOWN
ENSG00000178409	BEND3	-1.75687	1.49332e-10	3.46754e-08	DOWN
ENSG00000261618	RP11-79H23.3	-1.75736	3.31622e-07	4.35791e-05	DOWN
ENSG00000139679	LPAR6	-1.76164	1.93034e-09	3.75349e-07	DOWN
ENSG00000137198	GMPR	-1.76403	9.03861e-06	0.000854452	DOWN
ENSG00000038427	VCAN	-1.78513	0.000878105	0.0384948	DOWN
ENSG00000142065	ZFP14	-1.819	0.000218753	0.0122815	DOWN
ENSG00000162734	PEA15	-1.83602	6.12237e-14	2.36175e-11	DOWN
ENSG00000256966	RP11-613M10.8	-1.85216	0.000111871	0.006924	DOWN
ENSG00000120049	KCNIP2	-1.85726	0.000216503	0.0121838	DOWN
ENSG00000141219	C17orf80	-1.86065	1.71278e-10	3.9389e-08	DOWN
ENSG00000155099	TMEM55A	-1.86755	1.67879e-05	0.00141553	DOWN
ENSG00000139531	SUOX	-1.87473	8.28641e-13	2.83123e-10	DOWN
ENSG00000133794	ARNTL	-1.88145	4.25587e-13	1.51922e-10	DOWN
ENSG00000247095	MIR210HG	-1.90638	3.94303e-06	0.000404744	DOWN
ENSG00000189180	ZNF33A	-1.90735	1.84579e-15	8.17513e-13	DOWN
ENSG00000153094	BCL2L11	-1.93921	1.05705e-11	3.04595e-09	DOWN
ENSG00000132570	PCBD2	-2.00103	3.19422e-12	1.03238e-09	DOWN
ENSG00000232434	C9orf172	-2.00745	0.000196752	0.0112308	DOWN
ENSG00000108639	SYNGR2	-2.01288	6.58559e-17	3.42407e-14	DOWN
ENSG00000126878	AIF1L	-2.01758	3.40451e-12	1.08568e-09	DOWN
ENSG00000008086	CDKL5	-2.01868	1.34933e-11	3.79669e-09	DOWN
ENSG00000135482	ZC3H10	-2.02613	9.86843e-05	0.00626056	DOWN
ENSG00000005981	ASB4	-2.05809	0.000382556	0.0192623	DOWN
ENSG00000175155	YPEL2	-2.08149	3.22939e-07	4.29096e-05	DOWN
ENSG00000172794	RAB37	-2.11441	9.36946e-06	0.000882242	DOWN
ENSG00000250067	YJEFN3	-2.15791	3.82942e-09	7.09987e-07	DOWN
ENSG00000244879	GABPB1-AS1	-2.18823	3.62445e-20	2.34286e-17	DOWN
ENSG00000196693	ZNF33B	-2.19101	7.47674e-18	4.06412e-15	DOWN
ENSG00000102385	DRP2	-2.20011	0.000758987	0.0339938	DOWN
ENSG00000197837	HIST4H4	-2.20015	9.35382e-12	2.76192e-09	DOWN
ENSG00000198830	HMGN2	-2.21158	4.35623e-23	3.59268e-20	DOWN
ENSG00000177721	ANXA2R	-2.24449	7.45732e-05	0.00495412	DOWN
ENSG00000172780	RAB43	-2.36714	3.54448e-16	1.69546e-13	DOWN
ENSG00000254806	SYS1-DBNDD2	-2.37003	0.000200837	0.0113825	DOWN
ENSG00000240224	UGT1A5	-2.44855	1.96836e-23	1.77208e-20	DOWN
ENSG00000273294	C1QTNF3-AMACR	-2.46329	0.000264517	0.0142809	DOWN
ENSG00000243414	TICAM2	-2.4731	1.51739e-07	2.19947e-05	DOWN
ENSG00000206053	HN1L	-2.47433	3.01396e-27	3.00354e-24	DOWN
ENSG00000167232	ZNF91	-2.52201	4.13724e-07	5.37774e-05	DOWN
ENSG00000266302	RP11-219A15.1	-2.56934	2.14197e-05	0.00173024	DOWN
ENSG00000254363	CTB-131B5.5	-2.5736	8.08101e-08	1.22325e-05	DOWN
ENSG00000239264	TXNDC5	-2.65136	3.8503e-31	6.57769e-28	DOWN
ENSG00000183291	2018-09-15	-2.66024	5.01591e-31	7.99771e-28	DOWN
ENSG00000151835	SACS	-2.85894	5.99127e-31	8.95582e-28	DOWN
ENSG00000279583	RP11-368N21.5	-2.86326	0.000910749	0.0396044	DOWN
ENSG00000185710	SMG1P4	-2.955	1.73427e-05	0.00143474	DOWN
ENSG00000163590	PPM1L	-3.09317	1.92285e-14	7.79473e-12	DOWN
ENSG00000239415	AP001469.9	-3.1543	1.46665e-06	0.000164685	DOWN
ENSG00000197385	ZNF860	-3.17736	2.22191e-10	4.96648e-08	DOWN
ENSG00000279302	RP11-16P20.4	-3.20005	0.00118753	0.0493952	DOWN
ENSG00000257390	RP11-762I7.5	-3.34304	7.95362e-10	1.59854e-07	DOWN
ENSG00000224818	RP11-134G8.10	-3.57362	5.05238e-17	2.68528e-14	DOWN
ENSG00000269693	CTD-2192J16.20	-3.5924	2.37247e-16	1.15801e-13	DOWN
ENSG00000176020	AMIGO3	-3.70283	5.82615e-08	9.10745e-06	DOWN
ENSG00000132639	SNAP25	-4.10766	0.000447975	0.0217327	DOWN
ENSG00000248592	TMEM110-MUSTN1	-4.10766	0.000447975	0.0217327	DOWN
ENSG00000104081	BMF	-4.15743	3.61734e-30	5.08917e-27	DOWN
ENSG00000243251	PGBD3	-4.37002	3.85913e-15	1.67816e-12	DOWN
ENSG00000282827	ATRIP	-4.40955	3.1227e-20	2.0746e-17	DOWN
ENSG00000181444	ZNF467	-4.59308	1.47851e-05	0.00128121	DOWN
ENSG00000229186	ADAM1A	-4.73924	5.03433e-19	3.01015e-16	DOWN
ENSG00000093134	VNN3	-5.10771	5.909e-08	9.17699e-06	DOWN
ENSG00000145040	UCN2	-6.66023	5.85329e-22	4.66644e-19	DOWN
ENSG00000270066	SCARNA2	-8.22871	1.37178e-46	4.1011e-43	DOWN
ENSG00000259075	POC1B-GALNT4	-8.33009	1.08603e-48	3.71064e-45	DOWN

## Sheet: all.counts.Bxpc-3-shOLR1_vs_B
gene id	gene name	log2FC	Pvalue	Qvalue	updown
ENSG00000259040	BLOC1S5-TXNDC5	#NAME?	1.61642e-121	3.92306e-117	DOWN
ENSG00000258838	ERCC6-PGBD3	#NAME?	2.06637e-27	6.26884e-24	DOWN
ENSG00000258588	TRIM6-TRIM34	#NAME?	3.85558e-22	4.925e-19	DOWN
ENSG00000198211	RP11-566K11.2	#NAME?	2.21221e-08	4.26113e-06	DOWN
ENSG00000264668	RP13-582O9.6	#NAME?	7.04324e-08	1.21234e-05	DOWN
ENSG00000221874	ZNF816-ZNF321P	#NAME?	4.1078e-07	6.0058e-05	DOWN
ENSG00000280165	PCDH20	#NAME?	4.1078e-07	6.0058e-05	DOWN
ENSG00000270008	RP11-298P3.4	#NAME?	1.3552e-06	0.000182726	DOWN
ENSG00000254673	RP11-598P20.5	#NAME?	4.53786e-06	0.00053463	DOWN
ENSG00000243696	RP5-966M1.6	#NAME?	1.54285e-05	0.00154094	DOWN
ENSG00000074660	SCARF1	#NAME?	0.000667207	0.0358255	DOWN
ENSG00000158806	NPM2	#NAME?	0.000667207	0.0358255	DOWN
ENSG00000256514	AP003419.11	#NAME?	0.000667207	0.0358255	DOWN
ENSG00000260371	RP11-343C2.9	#NAME?	0.000667207	0.0358255	DOWN
ENSG00000270800	RPS10-NUDT3	Inf	2.27269e-09	5.30368e-07	UP
ENSG00000197991	RP11-310K10.1	Inf	7.04324e-08	1.21234e-05	UP
ENSG00000186105	LRRC70	Inf	1.54285e-05	0.00154094	UP
ENSG00000197816	CCDC180	Inf	5.32834e-05	0.00433956	UP
ENSG00000259171	RP11-903H12.5	Inf	5.32834e-05	0.00433956	UP
ENSG00000111780	AL021546.6	Inf	0.000352487	0.0214407	UP
ENSG00000100101	RP1-37E16.12	Inf	0.000667207	0.0358255	UP
ENSG00000261011	RP11-96C23.11	Inf	0.000667207	0.0358255	UP
ENSG00000273259	SERPINA3	6.11569	2.50387e-16	1.73626e-13	UP
ENSG00000259288	BUB1B-PAK6	5.84859	1.48865e-36	1.20431e-32	UP
ENSG00000263020	XXbac-BPG32J3.22	5.21386	2.41201e-09	5.5752e-07	UP
ENSG00000118804	STBD1	4.96594	1.10143e-18	9.90061e-16	UP
ENSG00000267645	RP11-577H5.5	4.49421	4.12356e-35	2.00157e-31	UP
ENSG00000274810	NPHP3-ACAD11	4.47126	2.15968e-24	4.36795e-21	UP
ENSG00000273398	RP11-474G23.1	4.35823	2.59951e-05	0.00242655	UP
ENSG00000254806	SYS1-DBNDD2	4.33829	1.67645e-22	2.39339e-19	UP
ENSG00000272589	ZSWIM8-AS1	4.05343	0.000252789	0.0159771	UP
ENSG00000272593	RP11-339B21.11	4.05343	0.000252789	0.0159771	UP
ENSG00000228049	POLR2J2	3.9957	6.62422e-10	1.78633e-07	UP
ENSG00000271810	RP11-426L16.10	3.96594	0.000447975	0.0259484	UP
ENSG00000277726	RP4-635E18.9	3.96594	0.000447975	0.0259484	UP
ENSG00000236700	LINC01010	3.8728	0.000794618	0.0411202	UP
ENSG00000281530	DGCR12	3.8728	0.000794618	0.0411202	UP
ENSG00000258674	CTC-260F20.3	3.77309	1.05972e-15	6.95117e-13	UP
ENSG00000125999	BPIFB1	3.55093	2.95077e-05	0.00270246	UP
ENSG00000181444	ZNF467	3.48951	4.99871e-05	0.00414057	UP
ENSG00000242028	HYPK	3.39689	1.14319e-18	9.90901e-16	UP
ENSG00000170647	TMEM133	3.33927	1.43703e-15	9.17808e-13	UP
ENSG00000277957	SENP3-EIF4A1	3.33501	1.27161e-13	5.93501e-11	UP
ENSG00000079156	OSBPL6	3.28789	0.000243751	0.015568	UP
ENSG00000237399	PITRM1-AS1	3.13589	2.84737e-05	0.00263762	UP
ENSG00000232931	LINC00342	2.96594	9.86585e-06	0.00104106	UP
ENSG00000184226	PCDH9	2.91326	2.89012e-08	5.47994e-06	UP
ENSG00000230392	RP5-1139I1.1	2.90455	0.000206996	0.0138396	UP
ENSG00000258590	NBEAP1	2.90455	0.000206996	0.0138396	UP
ENSG00000249673	NOP14-AS1	2.8918	7.83346e-16	5.28106e-13	UP
ENSG00000104081	BMF	2.85805	5.57386e-20	5.63657e-17	UP
ENSG00000119401	TRIM32	2.83696	3.29337e-27	7.993e-24	UP
ENSG00000170369	CST2	2.72085	0.000103608	0.0078092	UP
ENSG00000119280	C1orf198	2.7069	2.62723e-18	2.05687e-15	UP
ENSG00000162461	SLC25A34	2.66639	0.000165623	0.0116275	UP
ENSG00000239264	TXNDC5	2.65526	4.44798e-32	1.79921e-28	UP
ENSG00000144182	LIPT1	2.64401	3.35545e-05	0.00296944	UP
ENSG00000122133	PAEP	2.55093	0.000421961	0.0251622	UP
ENSG00000251357	AP000350.10	2.52654	1.52827e-18	1.279e-15	UP
ENSG00000249240	AC069368.3	2.48951	0.000672116	0.0360094	UP
ENSG00000243251	PGBD3	2.48365	7.32561e-08	1.25206e-05	UP
ENSG00000170100	ZNF778	2.45455	4.77949e-14	2.46805e-11	UP
ENSG00000149300	C11orf52	2.45135	0.000200837	0.0135022	UP
ENSG00000175395	ZNF25	2.45123	3.62217e-07	5.39325e-05	UP
ENSG00000083844	ZNF264	2.4029	6.54413e-23	9.92663e-20	UP
ENSG00000118263	KLF7	2.38547	9.74326e-25	2.14972e-21	UP
ENSG00000213694	S1PR3	2.33491	0.000150641	0.0106902	UP
ENSG00000152642	GPD1L	2.28776	4.90577e-11	1.60896e-08	UP
ENSG00000177409	SAMD9L	2.25339	2.17637e-23	4.06311e-20	UP
ENSG00000255508	RP11-864I4.1	2.21372	9.81599e-11	2.97793e-08	UP
ENSG00000078967	UBE2D4	2.16222	1.69857e-09	4.0416e-07	UP
ENSG00000114786	ABHD14A-ACY1	2.13574	4.74733e-11	1.57832e-08	UP
ENSG00000248405	PRR5-ARHGAP8	2.11256	0.000382556	0.0229818	UP
ENSG00000187908	DMBT1	2.10329	3.24692e-05	0.00290167	UP
ENSG00000225855	RUSC1-AS1	2.09504	0.000184687	0.012662	UP
ENSG00000198894	CIPC	2.0892	1.6688e-14	9.20494e-12	UP
ENSG00000187210	GCNT1	2.08822	1.89426e-12	7.79213e-10	UP
ENSG00000181027	FKRP	2.08611	1.27797e-08	2.56333e-06	UP
ENSG00000182648	LINC01006	2.03622	2.37222e-06	0.000299863	UP
ENSG00000272410	RP11-438J1.1	2.01636	0.000857787	0.0436446	UP
ENSG00000248323	LUCAT1	2.00141	9.86843e-05	0.00748459	UP
ENSG00000031081	ARHGAP31	1.99332	1.45728e-05	0.00147367	UP
ENSG00000188613	NANOS1	1.98288	2.17239e-07	3.35822e-05	UP
ENSG00000180574	EIF2S3L	1.91994	0.000877812	0.044477	UP
ENSG00000100867	DHRS2	1.90639	2.03967e-19	1.98011e-16	UP
ENSG00000177427	MIEF2	1.89745	8.1531e-08	1.37414e-05	UP
ENSG00000007306	CEACAM7	1.88642	3.0572e-05	0.00276859	UP
ENSG00000172748	ZNF596	1.8833	0.000608709	0.0338063	UP
ENSG00000155287	SLC25A28	1.87855	9.71806e-14	4.62465e-11	UP
ENSG00000164284	GRPEL2	1.84594	6.12084e-15	3.45471e-12	UP
ENSG00000223553	SMPD4P1	1.84026	0.000883481	0.044671	UP
ENSG00000258659	TRIM34	1.83617	4.945e-08	9.09207e-06	UP
ENSG00000074211	PPP2R2C	1.8138	0.000612799	0.0338785	UP
ENSG00000113389	NPR3	1.79675	1.22731e-09	3.10278e-07	UP
ENSG00000215012	C22orf29	1.78397	5.22191e-13	2.34696e-10	UP
ENSG00000249773	RP11-15K19.2	1.76229	5.21702e-08	9.52008e-06	UP
ENSG00000100823	APEX1	1.75563	6.96846e-14	3.38249e-11	UP
ENSG00000205659	LIN52	1.74341	7.12085e-10	1.83854e-07	UP
ENSG00000261611	AC010547.9	1.74339	8.81766e-07	0.000125885	UP
ENSG00000255154	RP11-80H18.3	1.72829	1.13512e-06	0.000155646	UP
ENSG00000282827	ATRIP	1.72829	1.13512e-06	0.000155646	UP
ENSG00000163376	KBTBD8	1.72068	7.48046e-08	1.26959e-05	UP
ENSG00000117983	MUC5B	1.71677	6.48609e-08	1.15748e-05	UP
ENSG00000149054	ZNF215	1.70015	6.70042e-09	1.40189e-06	UP
ENSG00000257594	GALNT4	1.69738	6.63735e-12	2.47828e-09	UP
ENSG00000185414	MRPL30	1.6871	3.79681e-11	1.29787e-08	UP
ENSG00000125962	ARMCX5	1.67547	1.48968e-10	4.35597e-08	UP
ENSG00000205212	CCDC144NL	1.67367	0.000218654	0.0143814	UP
ENSG00000135272	MDFIC	1.67106	1.79186e-12	7.62954e-10	UP
ENSG00000156671	SAMD8	1.66958	2.7488e-14	1.48252e-11	UP
ENSG00000168301	KCTD6	1.66624	3.67393e-05	0.00317317	UP
ENSG00000137198	GMPR	1.64386	4.89418e-05	0.00409543	UP
ENSG00000155111	CDK19	1.63675	1.23646e-10	3.7048e-08	UP
ENSG00000244115	DNAJC25-GNG10	1.6179	0.000577021	0.0324173	UP
ENSG00000166225	FRS2	1.60411	6.55264e-13	2.8915e-10	UP
ENSG00000008952	SEC62	1.57185	1.32932e-12	5.76119e-10	UP
ENSG00000260537	RP11-529K1.3	1.56989	2.92013e-05	0.00269474	UP
ENSG00000198625	MDM4	1.55497	3.56986e-12	1.39743e-09	UP
ENSG00000130054	FAM155B	1.55077	4.65818e-06	0.000546155	UP
ENSG00000148677	ANKRD1	1.53716	4.05497e-10	1.1312e-07	UP
ENSG00000175265	GOLGA8A	1.52159	2.279e-12	9.18464e-10	UP
ENSG00000168994	PXDC1	1.51656	1.35023e-09	3.31468e-07	UP
ENSG00000162073	PAQR4	1.51178	2.36071e-10	6.82077e-08	UP
ENSG00000135074	ADAM19	1.50257	6.89592e-08	1.20406e-05	UP
ENSG00000226057	PHF2P2	1.48942	0.000993175	0.0496997	UP
ENSG00000165156	ZHX1	1.47826	6.92517e-10	1.80724e-07	UP
ENSG00000239704	CDRT4	1.45521	0.000104315	0.00783815	UP
ENSG00000162065	TBC1D24	1.45375	1.61791e-09	3.88779e-07	UP
ENSG00000185730	ZNF696	1.41326	0.000430601	0.0253043	UP
ENSG00000228315	GUSBP11	1.39715	9.72116e-07	0.000135593	UP
ENSG00000134758	RNF138	1.39674	5.24099e-10	1.44544e-07	UP
ENSG00000158813	EDA	1.38085	0.000770035	0.0403645	UP
ENSG00000203326	ZNF525	1.36791	1.35209e-09	3.31468e-07	UP
ENSG00000119862	LGALSL	1.36557	4.53876e-07	6.55688e-05	UP
ENSG00000131323	TRAF3	1.36473	5.92425e-10	1.61552e-07	UP
ENSG00000187764	SEMA4D	1.34972	3.23136e-05	0.00290167	UP
ENSG00000147206	NXF3	1.34431	0.000192398	0.0130773	UP
ENSG00000139644	TMBIM6	1.3399	7.47555e-11	2.32605e-08	UP
ENSG00000139531	SUOX	1.33691	4.80703e-08	8.90584e-06	UP
ENSG00000102837	OLFM4	1.33037	4.93768e-05	0.00410403	UP
ENSG00000203666	EFCAB2	1.31726	0.00031911	0.0195576	UP
ENSG00000143147	GPR161	1.30728	1.06769e-06	0.000148074	UP
ENSG00000162769	FLVCR1	1.29433	2.27512e-07	3.49475e-05	UP
ENSG00000197405	C5AR1	1.29363	3.4228e-05	0.00300651	UP
ENSG00000089335	ZNF302	1.28651	2.50816e-08	4.79316e-06	UP
ENSG00000161671	EMC10	1.27499	2.46031e-09	5.63317e-07	UP
ENSG00000135679	MDM2	1.2518	5.27267e-09	1.15286e-06	UP
ENSG00000198860	TSEN15	1.25121	1.23208e-06	0.000167992	UP
ENSG00000143631	FLG	1.2512	2.65191e-06	0.000328377	UP
ENSG00000133142	TCEAL4	1.24822	0.000228579	0.0148332	UP
ENSG00000120217	CD274	1.24067	5.92478e-06	0.000665715	UP
ENSG00000173011	TADA2B	1.23484	2.97969e-06	0.000363403	UP
ENSG00000136874	STX17	1.2343	6.08558e-08	1.09405e-05	UP
ENSG00000068354	TBC1D25	1.23233	1.54007e-05	0.00154094	UP
ENSG00000157510	AFAP1L1	1.22482	1.7642e-08	3.45299e-06	UP
ENSG00000173875	ZNF791	1.22034	1.16375e-07	1.89558e-05	UP
ENSG00000258947	TUBB3	1.21999	2.63737e-06	0.000328251	UP
ENSG00000140153	WDR20	1.2198	2.16403e-07	3.35822e-05	UP
ENSG00000168497	SDPR	1.21956	7.79242e-05	0.00610071	UP
ENSG00000114439	BBX	1.21392	6.08027e-09	1.29446e-06	UP
ENSG00000015153	YAF2	1.20728	2.35659e-06	0.000299447	UP
ENSG00000171658	RP11-443P15.2	1.18302	0.000368005	0.0222176	UP
ENSG00000103264	FBXO31	1.18005	3.40903e-07	5.10723e-05	UP
ENSG00000224959	AC017002.2	1.17993	2.51643e-05	0.0023672	UP
ENSG00000105518	TMEM205	1.1744	1.20402e-05	0.0012382	UP
ENSG00000198121	LPAR1	1.16492	1.70164e-07	2.73502e-05	UP
ENSG00000081189	MEF2C	1.16374	0.000161595	0.0114342	UP
ENSG00000169756	LIMS1	1.15992	8.75038e-08	1.44471e-05	UP
ENSG00000126698	DNAJC8	1.15213	6.67443e-08	1.17383e-05	UP
ENSG00000122068	FYTTD1	1.14893	1.77797e-07	2.8389e-05	UP
ENSG00000215182	MUC5AC	1.13665	2.22749e-06	0.000284532	UP
ENSG00000171570	RAB4B-EGLN2	1.13575	0.000309018	0.0190352	UP
ENSG00000019186	CYP24A1	1.12978	0.000240462	0.0153984	UP
ENSG00000141431	ASXL3	1.12875	0.000405123	0.0242774	UP
ENSG00000169255	B3GALNT1	1.11468	0.000104826	0.00785223	UP
ENSG00000183647	ZNF530	1.11124	3.073e-05	0.00277256	UP
ENSG00000186417	GLDN	1.11019	2.98244e-05	0.0027212	UP
ENSG00000170545	SMAGP	1.10861	4.15349e-06	0.000496578	UP
ENSG00000139112	GABARAPL1	1.09662	2.5761e-06	0.000322278	UP
ENSG00000164294	GPX8	1.09074	3.76801e-06	0.000452721	UP
ENSG00000160201	U2AF1	1.08365	0.000660471	0.0358255	UP
ENSG00000099800	TIMM13	1.07633	1.10898e-05	0.00115701	UP
ENSG00000187257	RSBN1L	1.05945	1.9563e-06	0.000256411	UP
ENSG00000171067	C11orf24	1.05676	1.90048e-05	0.0018524	UP
ENSG00000117481	NSUN4	1.04958	3.74528e-06	0.000452228	UP
ENSG00000124380	SNRNP27	1.0476	4.45707e-05	0.0037691	UP
ENSG00000211460	TSN	1.0362	5.25883e-06	0.00060777	UP
ENSG00000163682	RPL9	1.03379	6.79707e-05	0.00537345	UP
ENSG00000113742	CPEB4	1.02759	2.43097e-05	0.00231371	UP
ENSG00000013619	MAMLD1	1.02647	2.53592e-05	0.00237633	UP
ENSG00000078081	LAMP3	1.01473	0.0008521	0.0434463	UP
ENSG00000196214	ZNF766	1.01178	5.07915e-05	0.00419289	UP
ENSG00000085365	SCAMP1	1.00498	7.07222e-06	0.000780194	UP
ENSG00000240224	UGT1A5	-1.00736	4.78219e-05	0.00401604	DOWN
ENSG00000165775	FUNDC2	-1.01084	3.34633e-05	0.00296944	DOWN
ENSG00000120697	ALG5	-1.01098	0.000360417	0.0218138	DOWN
ENSG00000078246	TULP3	-1.01576	3.78726e-05	0.00325946	DOWN
ENSG00000241119	UGT1A9	-1.01824	0.000356645	0.0216394	DOWN
ENSG00000108061	SHOC2	-1.02028	5.82853e-06	0.000658964	DOWN
ENSG00000082153	BZW1	-1.02637	1.8398e-06	0.000243999	DOWN
ENSG00000182093	WRB	-1.0268	0.000251173	0.015958	DOWN
ENSG00000069667	RORA	-1.02849	9.68571e-05	0.00736904	DOWN
ENSG00000076067	RBMS2	-1.03848	2.8424e-06	0.000350178	DOWN
ENSG00000116489	CAPZA1	-1.04376	9.60284e-07	0.000134717	DOWN
ENSG00000134243	SORT1	-1.0539	5.72768e-06	0.000658819	DOWN
ENSG00000164080	RAD54L2	-1.05465	3.7189e-06	0.000451289	DOWN
ENSG00000126524	SBDS	-1.05615	1.96054e-06	0.000256411	DOWN
ENSG00000089486	CDIP1	-1.0637	6.12747e-05	0.00490805	DOWN
ENSG00000204147	ASAH2B	-1.09045	0.000133083	0.00958437	DOWN
ENSG00000204920	ZNF155	-1.09417	5.4863e-05	0.00445326	DOWN
ENSG00000177873	ZNF619	-1.10046	3.59473e-05	0.00312703	DOWN
ENSG00000167380	ZNF226	-1.1013	1.11077e-05	0.00115701	DOWN
ENSG00000123179	EBPL	-1.10458	0.000149161	0.0106439	DOWN
ENSG00000166471	TMEM41B	-1.10738	4.85849e-06	0.000566902	DOWN
ENSG00000147536	GINS4	-1.11613	1.1607e-05	0.00119873	DOWN
ENSG00000112062	MAPK14	-1.11785	4.4429e-07	6.45684e-05	DOWN
ENSG00000135932	CAB39	-1.11984	3.08899e-07	4.68561e-05	DOWN
ENSG00000198908	BHLHB9	-1.121	1.82499e-05	0.00180786	DOWN
ENSG00000227036	LINC00511	-1.1411	5.22903e-05	0.00430198	DOWN
ENSG00000115884	SDC1	-1.16093	8.28864e-08	1.38735e-05	DOWN
ENSG00000197045	GMFB	-1.16141	2.45929e-07	3.75389e-05	DOWN
ENSG00000198818	SFT2D1	-1.16969	0.000114842	0.00842059	DOWN
ENSG00000074696	HACD3	-1.17554	8.72658e-08	1.44471e-05	DOWN
ENSG00000122203	KIAA1191	-1.18648	1.32004e-07	2.13583e-05	DOWN
ENSG00000162139	NEU3	-1.20412	0.000309018	0.0190352	DOWN
ENSG00000135709	KIAA0513	-1.2071	1.49759e-06	0.000200809	DOWN
ENSG00000183044	ABAT	-1.21552	5.07447e-06	0.000589269	DOWN
ENSG00000131979	GCH1	-1.21593	5.79205e-06	0.000658964	DOWN
ENSG00000135503	ACVR1B	-1.2277	6.6268e-08	1.17383e-05	DOWN
ENSG00000124767	GLO1	-1.26712	5.94825e-09	1.27756e-06	DOWN
ENSG00000149257	SERPINH1	-1.27634	4.13127e-09	9.28388e-07	DOWN
ENSG00000256594	RP11-705C15.2	-1.29092	1.90904e-07	3.01925e-05	DOWN
ENSG00000120327	PCDHB14	-1.29158	1.91705e-05	0.00186107	DOWN
ENSG00000185379	RAD51D	-1.29496	1.3331e-06	0.00018075	DOWN
ENSG00000174912	METTL15P1	-1.2972	0.000762355	0.0400484	DOWN
ENSG00000205213	LGR4	-1.30338	1.78997e-09	4.21772e-07	DOWN
ENSG00000235333	PVRIG2P	-1.3055	2.46472e-05	0.00233667	DOWN
ENSG00000185728	YTHDF3	-1.30799	7.18231e-09	1.47724e-06	DOWN
ENSG00000215717	TMEM167B	-1.31884	1.6145e-08	3.2118e-06	DOWN
ENSG00000187372	PCDHB13	-1.32369	0.000238022	0.0153231	DOWN
ENSG00000149792	MRPL49	-1.34716	3.28387e-08	6.13073e-06	DOWN
ENSG00000117862	TXNDC12	-1.35443	8.62909e-10	2.2045e-07	DOWN
ENSG00000256028	RP11-197N18.2	-1.3628	5.65082e-05	0.00455632	DOWN
ENSG00000213588	ZBTB9	-1.3641	2.96243e-06	0.000363122	DOWN
ENSG00000241635	UGT1A1	-1.36889	1.3411e-09	3.31468e-07	DOWN
ENSG00000123989	CHPF	-1.38073	1.68846e-08	3.33162e-06	DOWN
ENSG00000139998	RAB15	-1.38782	3.03854e-05	0.00276199	DOWN
ENSG00000108639	SYNGR2	-1.39215	3.55016e-09	8.05256e-07	DOWN
ENSG00000104765	BNIP3L	-1.3954	1.40788e-10	4.16698e-08	DOWN
ENSG00000083937	CHMP2B	-1.39713	6.45895e-09	1.36312e-06	DOWN
ENSG00000106692	FKTN	-1.39776	1.39073e-09	3.3753e-07	DOWN
ENSG00000211448	DIO2	-1.40766	0.000949785	0.0476266	DOWN
ENSG00000146476	ARMT1	-1.4127	6.96586e-09	1.44497e-06	DOWN
ENSG00000166401	SERPINB8	-1.45492	5.27202e-09	1.15286e-06	DOWN
ENSG00000188107	EYS	-1.46302	0.000221149	0.0145062	DOWN
ENSG00000100380	ST13	-1.48947	1.1567e-11	4.12841e-09	DOWN
ENSG00000116044	NFE2L2	-1.49027	1.14101e-11	4.12841e-09	DOWN
ENSG00000092847	AGO1	-1.50076	6.96074e-11	2.19399e-08	DOWN
ENSG00000109079	TNFAIP1	-1.50278	7.62931e-11	2.34384e-08	DOWN
ENSG00000168300	PCMTD1	-1.51029	2.962e-11	1.02697e-08	DOWN
ENSG00000171475	WIPF2	-1.51668	4.97881e-11	1.61114e-08	DOWN
ENSG00000136826	KLF4	-1.52773	4.62682e-11	1.55962e-08	DOWN
ENSG00000197483	ZNF628	-1.54009	0.000106442	0.00794876	DOWN
ENSG00000162999	DUSP19	-1.54116	0.000486586	0.027743	DOWN
ENSG00000196391	ZNF774	-1.57186	1.8117e-05	0.00180205	DOWN
ENSG00000184900	SUMO3	-1.59877	1.86909e-12	7.79213e-10	DOWN
ENSG00000243335	KCTD7	-1.59981	4.91047e-05	0.00409543	DOWN
ENSG00000256223	ZNF10	-1.63244	1.18139e-08	2.38936e-06	DOWN
ENSG00000224818	RP11-134G8.10	-1.64037	3.35589e-07	5.05884e-05	DOWN
ENSG00000181029	TRAPPC5	-1.6674	1.0381e-07	1.70234e-05	DOWN
ENSG00000197385	ZNF860	-1.6698	8.46913e-06	0.000909495	DOWN
ENSG00000007933	FMO3	-1.68191	0.000410333	0.024529	DOWN
ENSG00000248905	FMN1	-1.68638	3.61594e-14	1.9078e-11	DOWN
ENSG00000165714	BORCS5	-1.7105	3.12784e-08	5.8847e-06	DOWN
ENSG00000115594	IL1R1	-1.72225	4.28458e-09	9.54006e-07	DOWN
ENSG00000233276	GPX1	-1.73533	5.13111e-14	2.59442e-11	DOWN
ENSG00000204282	TNRC6C-AS1	-1.74607	1.96508e-06	0.000256411	DOWN
ENSG00000164181	ELOVL7	-1.74854	4.22184e-12	1.62641e-09	DOWN
ENSG00000002726	AOC1	-1.77112	5.83755e-06	0.000658964	DOWN
ENSG00000158985	CDC42SE2	-1.78578	2.13933e-15	1.29804e-12	DOWN
ENSG00000137872	SEMA6D	-1.78908	8.549e-05	0.00659499	DOWN
ENSG00000188283	ZNF383	-1.79393	1.91843e-08	3.72481e-06	DOWN
ENSG00000198521	ZNF43	-1.80468	4.68616e-05	0.00394906	DOWN
ENSG00000226396	RP5-1056L3.3	-1.8482	1.9158e-07	3.01925e-05	DOWN
ENSG00000237440	ZNF737	-1.86009	0.000430003	0.0253043	DOWN
ENSG00000196109	ZNF676	-1.87373	8.25474e-06	0.000894387	DOWN
ENSG00000106723	SPIN1	-1.88045	3.75997e-17	2.76529e-14	DOWN
ENSG00000186684	CYP27C1	-1.88833	0.000111871	0.00825638	DOWN
ENSG00000122140	MRPS2	-1.89123	3.73319e-13	1.70952e-10	DOWN
ENSG00000160229	ZNF66	-1.92169	0.000426762	0.0252622	DOWN
ENSG00000198585	NUDT16	-1.92401	2.53887e-10	7.16491e-08	DOWN
ENSG00000132570	PCBD2	-1.95385	2.27598e-11	8.0055e-09	DOWN
ENSG00000134108	ARL8B	-1.97315	7.52628e-18	5.70822e-15	DOWN
ENSG00000151135	TMEM263	-1.99112	8.67429e-17	6.19191e-14	DOWN
ENSG00000147124	ZNF41	-1.99601	2.30846e-12	9.18464e-10	DOWN
ENSG00000148218	ALAD	-2.03773	5.55147e-15	3.20796e-12	DOWN
ENSG00000181896	ZNF101	-2.0513	2.17239e-07	3.35822e-05	DOWN
ENSG00000166801	FAM111A	-2.05137	3.36631e-20	3.55219e-17	DOWN
ENSG00000196268	ZNF493	-2.05413	9.23913e-07	0.000131131	DOWN
ENSG00000249274	PDLIM1P4	-2.08477	5.7756e-06	0.000658964	DOWN
ENSG00000124243	BCAS4	-2.08483	5.53378e-09	1.19915e-06	DOWN
ENSG00000173402	DAG1	-2.08974	1.90104e-20	2.0972e-17	DOWN
ENSG00000180479	ZNF571	-2.0931	1.8943e-05	0.0018524	DOWN
ENSG00000213638	ADAT3	-2.12929	2.47454e-05	0.00233685	DOWN
ENSG00000274527	RP11-146B14.1	-2.20402	0.000124562	0.00905122	DOWN
ENSG00000244474	UGT1A4	-2.23874	5.35478e-21	6.49803e-18	DOWN
ENSG00000182600	C2orf82	-2.28795	6.58251e-07	9.4531e-05	DOWN
ENSG00000241962	RP11-111H13.1	-2.31426	0.000112452	0.00827032	DOWN
ENSG00000120328	PCDHB12	-2.35617	0.00023063	0.0148867	DOWN
ENSG00000270136	MINOS1-NBL1	-2.38206	9.39308e-07	0.000132541	DOWN
ENSG00000238795	SCARNA12	-2.38786	6.22296e-06	0.000692804	DOWN
ENSG00000214652	ZNF727	-2.41281	0.000488104	0.027743	DOWN
ENSG00000119844	AFTPH	-2.47029	3.53596e-23	6.12985e-20	DOWN
ENSG00000215472	RPL17-C18orf32	-2.61391	2.41144e-18	1.95086e-15	DOWN
ENSG00000272414	FAM47E-STBD1	-2.6362	6.77802e-10	1.80372e-07	DOWN
ENSG00000174306	ZHX3	-2.65567	6.53847e-23	9.92663e-20	DOWN
ENSG00000250067	YJEFN3	-2.69129	6.83732e-10	1.80372e-07	DOWN
ENSG00000197472	ZNF695	-2.72227	5.98948e-08	1.08481e-05	DOWN
ENSG00000167232	ZNF91	-2.73993	6.92016e-14	3.38249e-11	DOWN
ENSG00000259075	POC1B-GALNT4	-2.76926	4.3839e-19	4.0922e-16	DOWN
ENSG00000233396	RP11-458D21.1	-2.7712	0.000910749	0.0458587	DOWN
ENSG00000197124	ZNF682	-2.79985	1.36697e-05	0.00139608	DOWN
ENSG00000273294	C1QTNF3-AMACR	-2.80681	2.40176e-10	6.85774e-08	DOWN
ENSG00000254363	CTB-131B5.5	-2.80682	2.04767e-06	0.000265759	DOWN
ENSG00000256229	ZNF486	-2.8921	4.04722e-05	0.00347088	DOWN
ENSG00000186300	ZNF555	-2.91871	6.21837e-12	2.35812e-09	DOWN
ENSG00000136997	MYC	-2.94107	3.78243e-22	4.925e-19	DOWN
ENSG00000160321	ZNF208	-2.94111	3.66497e-07	5.42371e-05	DOWN
ENSG00000196693	ZNF33B	-2.9493	2.78211e-27	7.50241e-24	DOWN
ENSG00000236859	NIFK-AS1	-3.16338	2.4095e-06	0.000302998	DOWN
ENSG00000238227	C9orf69	-3.21223	1.11212e-30	3.85588e-27	DOWN
ENSG00000123096	SSPN	-3.22394	5.48047e-11	1.75014e-08	DOWN
ENSG00000149948	HMGA2	-3.23842	1.16372e-48	1.70431e-32	DOWN
ENSG00000249087	ZNF436-AS1	-3.31962	1.99861e-15	1.24375e-12	DOWN
ENSG00000171867	PRNP	-3.37136	2.18372e-48	2.64994e-44	DOWN
ENSG00000248919	ATP5J2-PTCD1	-3.61942	2.95077e-05	0.00270246	DOWN
ENSG00000226147	TUBBP10	-3.89246	2.1476e-06	0.000277246	DOWN
ENSG00000178750	STX19	-3.9406	0.000794618	0.0411202	DOWN
ENSG00000230356	NCAPD2P1	-3.9406	0.000794618	0.0411202	DOWN
ENSG00000244457	ENO1P1	-4.35641	7.71158e-09	1.57277e-06	DOWN
ENSG00000158301	GPRASP2	-4.43794	6.83809e-21	7.90288e-18	DOWN
ENSG00000267368	UPK3BL	-4.56256	2.72632e-35	1.6542e-31	DOWN
ENSG00000257390	RP11-762I7.5	-4.71605	2.52803e-15	1.49647e-12	DOWN
ENSG00000271895	RP4-635E18.8	-4.73416	1.5797e-06	0.000210655	DOWN
ENSG00000261427	CTD-2349B8.1	-5.64844	8.60156e-12	3.16303e-09	DOWN
